1 **Multilocus sequence analysis, a rapid and accurate identification tool for**  
2 **taxonomic classification, evolutionary relationship and population biology of the**  
3 **genus *Shewanella*.**

4 Yujie Fang<sup>a,b,c</sup>, Yonglu Wang<sup>d</sup>, Zongdong Liu<sup>e</sup>, Hang Dai<sup>a,b,c</sup>, Hongyan Cai<sup>a,b,c</sup>,  
5 Zhenpeng Li<sup>a,b</sup>, Zongjun Du<sup>f</sup>, Xin Wang<sup>a,b</sup>, Huaiqi Jing<sup>a,b</sup>, Qiang Wei<sup>c,g</sup>, Biao Kan<sup>a,b</sup>,  
6 Duochun Wang<sup>a,b,c\*</sup>

7 <sup>a</sup> State Key Laboratory of Infectious Disease Prevention and Control, National  
8 Institute for Communicable Disease Control and Prevention, Chinese Center for  
9 Disease Control and Prevention (China CDC), Beijing, 102206, China.

10 <sup>b</sup> Collaborative Innovation Center for Diagnosis and Treatment of Infectious Diseases,  
11 Hangzhou, 310003, China.

12 <sup>c</sup> Center for Human Pathogenic Culture Collection, China CDC, Beijing, 102206,  
13 China.

14 <sup>d</sup> Ma'anshan Center for Disease Control and Prevention, Anhui Province, China.

15 <sup>e</sup> Laizhou Center for Disease Control and Prevention, Shandong Province, China.

16 <sup>f</sup> College of Marine Science, Shandong University at Weihai, China.

17 <sup>g</sup> Office of laboratory management, China CDC, Beijing, 102206, China.

18 Running title: Multilocus sequence analysis of genus *Shewanella*.

19 \*Correspondence Author: Duochun Wang, wangduochun@icdc.cn. Changbai Road  
20 155, Changping, Beijing, 102206, China.

21

22 **ABSTRACT**

23 The genus *Shewanella* comprises a group of marine-dwelling species with worldwide  
24 distribution. Several species are regarded as causative agents of food spoilage and  
25 opportunistic pathogens of human diseases. In this study, a standard multilocus  
26 sequence analysis (MLSA) based on six protein-coding genes (*gyrA*, *gyrB*, *infB*, *recN*,  
27 *rpoA* and *topA*) was established as a rapid and accurate identification tool in fifty-nine

---

The nucleotide sequences of six HKGs are deposited in GenBank nucleotide sequence database under accession numbers of *gyrA*: MH090144-MH090185; *gyrB*: MH090186-MH090202; *infB*: MH090203-MH090244; *recN*: MH090245-MH090286; *rpoA*: MH090287-MH090328; and *topA*: MH090329-MH090370.

28 type *Shewanella* strains. This method yielded sufficient resolving power in regard to  
29 enough informative sites, adequate sequence divergences and distinct interspecies  
30 branches. The stability of phylogenetic topology was supported by high bootstrap  
31 values and concordance with different methods. The reliability of the MLSA scheme  
32 was further validated by identical phylogenies and high correlations of genomes. The  
33 MLSA approach provided a robust system to exhibit evolutionary relationships in the  
34 *Shewanella* genus. The split network tree proposed twelve distinct monophyletic  
35 clades with identical G+C contents and high genetic similarities. Eighty-six tested  
36 strains were investigated to explore the population biology of the *Shewanella* genus in  
37 China. The most prevalent *Shewanella* species were *Shewanella algae*, *Shewanella*  
38 *xiamenensis*, *Shewanella chilikensis*, *Shewanella indica*, *Shewanella seohaensis* and  
39 *Shewanella carassii*. The strains frequently isolated from clinical and food samples  
40 highlighted the importance of increasing the surveillance of *Shewanella* species.  
41 Combined with the genetic, genomic and phenotypic analyses, *Shewanella upenei*  
42 should be considered a synonym of *S. algae*, and *Shewanella pacifica* should be  
43 reclassified as a synonym of *Shewanella japonica*.

#### 44 **IMPORTANCE**

45 The MLSA scheme based on six HKGs (*gyrA*, *gyrB*, *infB*, *recN*, *rpoA* and *topA*) is  
46 well established as a reliable tool for taxonomic, evolutionary and epidemiological  
47 analyses of the genus *Shewanella* in this study. The standard MLSA method allows  
48 researchers to make rapid, economical and precise identification of *Shewanella* strains.  
49 The robust phylogenetic network of MLSA provides profound insight into the  
50 evolutionary structure of the genus *Shewanella*. The population genetics of  
51 *Shewanella* species determined by the MLSA approach plays a pivotal role in clinical  
52 diagnosis and routine monitoring. Further studies on remaining species and genomic  
53 analysis will enhance a more comprehensive understanding of the microbial  
54 systematics, phylogenetic relationships and ecological status of the genus *Shewanella*.

55 **KEYWORDS** multilocus sequence analysis, taxonomic classification, evolutionary  
56 relationship, population biology, *Shewanella*.

57 The genus *Shewanella*, first described by MacDonell & Colwell, belongs to the

58 family *Shewanellaceae* as a sole genus (1). The members of this genus are  
59 gram-negative, facultatively anaerobic, oxidase-positive and motile bacteria (2-4). At  
60 the time of writing, there are more than sixty recognized species in the genus of  
61 *Shewanella* (<http://www.bacterio.net/shewanella.html>). The majority of *Shewanella*  
62 species inhabit a wide range of environments, including free-living in oceans (5-8).  
63 The genus *Shewanella* plays a critical role in bioremediation (9), and certain strains  
64 have been used in bioelectrical systems (10, 11). In addition, multiple *Shewanella*  
65 species are frequently yielded from consumable products as spoilage bacteria and  
66 clinical specimens as opportunistic pathogens (12-14).

67 To date, polyphasic approaches are performed to assign the phylogenetic placement  
68 and taxonomic classification of *Shewanella* species. Commercial biochemical systems,  
69 such as Vitek and API, are available for species identification in clinical laboratories.  
70 However, only two species, namely, *S. algae* and *Shewanella putrefaciens*, have been  
71 recorded in the database (12, 13). Phylogenetic analysis based on the 16S rRNA gene  
72 as a molecular marker was utilized to yield an evolutionary relationship for taxa (15).  
73 The disadvantage of the application of the 16S rRNA gene was the low resolving  
74 power to discriminate closely related species due to their high sequence similarities  
75 (16). Recently, a more rapidly evolving housekeeping gene (HKG) of *gyrB* was  
76 selected as an alternative phylogenetic indicator for *Shewanella* species classification  
77 (17-20). Nevertheless, the quality of sequences submitted in public databases is poor  
78 (20-22). The genome-wide parameters, consisting of *in silico* DNA-DNA  
79 hybridization (*is*DDH) (23) and average nucleotide identity (ANI) (24), take the place  
80 of the wet-lab DDH to unravel bacterial systematics. However, the process of genome  
81 sequencing is expensive and time-consuming; meanwhile, limited genomes of type  
82 *Shewanella* species are available in public databases. These conditions make this  
83 approach impractical in clinical and daily investigations for rapid and efficient  
84 identification.

85 The effective MLSA scheme has been applied to increasing prokaryotic taxa, for  
86 instance, the genera of *Virbio* (25, 26), *Aeromonas* (27), *Enterobacter* (28),  
87 *Treponema* (29) and *Halomonadaceae* (30). Nevertheless, rare information is

88 delineated among the genus *Shewanella*. Hence, in this study, we established a  
89 reliable MLSA method to classify *Shewanella* species by assessing the nucleotide  
90 sequences and phylogenies of six individual and concatenated HKGs (*gyrA*, *gyrB*,  
91 *infB*, *recN*, *rpoA* and *topA*) in almost sixty type *Shewanella* strains. The phylogenetic  
92 framework of concatenated sequences provided a significant understanding of the  
93 evolutionary relationship in the genus *Shewanella* on the basis of multiple distinct  
94 taxonomic clades. The MLSA scheme was further utilized to determine the population  
95 biology of eighty-six tested strains collected in China.

## 96 **MATERIALS AND METHODS**

97 **Bacterial strains and culture conditions.** A total of 145 *Shewanella* strains were  
98 involved in this study. Forty-two type strains were collected from the China General  
99 Microbiological Culture Collection Center (CGMCC), the German Collection of  
100 Microorganisms and Cell Cultures (Deutsche Sammlung von Mikroorganismen und  
101 Zellkulturen, DSMZ), the Japan Collection of Microorganisms (JCM), Korean  
102 Collection for Type Cultures (KCTC), LMG Bacteria Collection (LMG) and Marine  
103 Culture Collection of China (MCCC); the other seventeen type strains with complete  
104 genomes that were available in GenBank were used for sequence analyses; eighty-six  
105 tested strains were isolated from patients (n = 44), food (n = 35) and environments (n  
106 = 7) in four provinces (Anhui, Hainan, Liaoning and Shandong) of China from 2007  
107 to 2016. Detailed type strain information is listed in Table S1. The forty-two type  
108 *Shewanella* strains were incubated at suitable conditions following the protocols of  
109 culture collection. The tested strains were cultured on Marine Agar 2216 (BD, Difco)  
110 at 35 °C for 18 h.

111 **DNA extraction, gene selection and primer design.** Genomic DNA from  
112 *Shewanella* strains was extracted with a genomic DNA extraction kit (TaKaRa, Dalian,  
113 China) following the manufacturer's instructions. The 16S rRNA gene of tested  
114 strains was amplified and sequenced with two universal primers (27F and 1492R)  
115 described previously (31). Six HKGs (*gyrA*, *gyrB*, *infB*, *recN*, *rpoA* and *topA*) were  
116 chosen for the MLSA scheme. The degenerate primers of HKGs for PCR  
117 amplification, except the *gyrB* gene referring to Yamamoto & Harayama (32), were

118 designed from genome sequences of type *Shewanella* strains in the GenBank database  
119 (Table S1) to accommodate a wide taxonomic scope. The nondegenerate primers on  
120 the 5' region for sequencing are underlined in Table S2.

121 **PCR amplification and sequencing.** Amplification reactions for six HKGs were  
122 performed in a total volume of 25  $\mu$ l, containing 12.5  $\mu$ l 2 $\times$  Es Taq MasterMix  
123 (Cwbiotech, China), 2  $\mu$ l each forward and reverse primer (10  $\mu$ M), 1.5  $\mu$ l template  
124 DNA (10-30 ng/ $\mu$ l) and 7  $\mu$ l ultrapure water using SensoQuest LabCycler. The PCR  
125 mixture was subjected to denaturation at 94  $^{\circ}$ C for 10 min, followed by 35 cycles of  
126 denaturation at 94  $^{\circ}$ C for 30 s, annealing at 54-60  $^{\circ}$ C for 30 s and extension at 72  $^{\circ}$ C  
127 for 60 s, with a final extension step at 72  $^{\circ}$ C for 10 min. More detailed information on  
128 annealing temperatures is listed in Table S2. PCR amplicons were verified by  
129 electrophoresis on 1 % agarose TBE gels at 220 V for 15 min, stained with GoldView  
130 (Solarbio, China), and visualized on a UV transilluminator with a clear single band at  
131 the expected length. The amplified products were purified and sequenced with the  
132 ABI 3730xl platform by Tsingke Corporation (Beijing) using the corresponding  
133 sequencing primers (Table S2).

134 **Analysis of nucleotide diversity.** The sequences of 16S rRNA, *gyrA*, *gyrB*, *infB*,  
135 *recN*, *rpoA* and *topA* genes used for MLSA were trimmed to positions 56-1455,  
136 247-744, 337-1446, 1519-2181, 565-1200, 139-756 and 106-768, respectively,  
137 corresponding to *E. coli* numbering (33). The evolutionary distances and sequence  
138 similarities of the 16S rRNA gene, individual and concatenated HKGs were calculated  
139 using MEGA 6.06 (34) with Kimura's 2-parameter model. The parsimony informative  
140 sites and *Ka/Ks* ratios (*Ka*: the number of nonsynonymous substitutions per  
141 nonsynonymous site, *Ks*: the number of synonymous substitutions per synonymous  
142 site) were analyzed with DnaSP 6.0 (35).

143 **Phylogenetic analysis.** The nucleotide sequences were aligned using MEGA 6.06  
144 (34). The phylogenetic trees of the 16S rRNA gene and the individual and  
145 concatenated sequences of six HKGs (*gyrA*, *gyrB*, *infB*, *recN*, *rpoA* and *topA*) were  
146 constructed by neighbor-joining and maximum-likelihood methods with MEGA 6.06.  
147 The model selected was Kimura's two-parameter with the pairwise-deletion option.

148 The robustness of tree topologies was evaluated with 1000 bootstrap replications, and  
149 values greater than 70 % are shown at nodes of branches. The split network tree of  
150 MLSA was performed by SplitsTree 4.14.4 using the Jukes-Cantor correlation.

151 **Genomic relatedness.** Twenty-eight type *Shewanella* strains with complete genomes  
152 available in GenBank (Table S1) were involved to investigate the concordance and  
153 correlation between MLSA and genomes. Core genes of genomic sequences identified  
154 by OrthoMCL 2.0.9 were concatenated to construct the phylogenetic tree. The *isDDH*  
155 results were measured by the Genome-to-Genome Distance Calculator (GGDC)  
156 (<http://ggdc.dsmz.de/>). The values of ANI were estimated by the web-based platform  
157 EZBioCloud (<http://www.ezbiocloud.net/tools/ani>) with the OrthoANIu algorithm.  
158 The correlation between the *isDDH* results and MLSA similarities was simulated  
159 using MATLAB R2016a (Math Works Inc., USA) with nonlinear interpolation  
160 analysis.

161 **Phenotypic characteristics.** Further phenotypic tests were performed among  
162 controversial *Shewanella* species whose *isDDH* values were greater than the species  
163 threshold. The type strains of species were examined in parallel under suitable  
164 conditions. Physiological and biochemical traits were determined by commercial  
165 strips, including API 20E and API 20NE (BioMérieux, France), in agreement with the  
166 standard manufacturer's instructions.

## 167 **RESULTS**

168 **Individual gene analysis.** In this study, sequence diversity and phylogenetic analysis  
169 of fifty-nine type strains (Table S3) were performed to assess the interspecies  
170 taxonomy among the genus *Shewanella*. The results of sequence diversity for the 16S  
171 rRNA gene are shown in Table 1. The high occurrences of greater than 98.65 %  
172 interspecies similarity in the 16S rRNA gene implied the low resolution to distinguish  
173 *Shewanella* species. The low bootstrap values indicated the unstable topology in the  
174 phylogenetic tree, and close evolutionary branches were discovered (Fig. S1). Among  
175 the six HKG analyses, greater values of parsimony informative sites and nucleotide  
176 diversity were obtained (Table 1). In addition, the phylogenetic trees of all HKGs  
177 demonstrated more distinct branches and greater bootstrap values in contrast with the

178 16S rRNA gene (Fig. S1). However, it was not sufficient to differentiate all members  
179 of the genus *Shewanella*. Lower bootstrap values for the outer branches and  
180 discordance in the partial topology of six HKGs were still observed.

181 **Multilocus sequence analysis (MLSA).** The concatenated sequences of  
182 protein-coding genes for fifty-nine type *Shewanella* strains comprised 2046 (48.8 %)   
183 parsimony informative sites with a nucleotide diversity value of 0.223 (Table 1). The  
184 analysis of sequences indicated that the MLSA scheme possessed an appropriate  
185 resolution and balanced the divergent evolutionary rates of six HKGs. The  
186 neighbor-joining phylogenetic tree based on concatenated alignment showed  
187 independent branches for interspecies, except for two sets of species, species *S.*  
188 *algae-S. haliotis-S. upenei* and *S. japonica-S. pacifica* (Fig. 1). Those five species  
189 were likely to be misclassified, and more approaches were needed to perform the  
190 identification. The branches to discriminate *Shewanella* species were supported by  
191 high bootstrap values, except for species *S. algicola-S. inventionis* and *S. carassii*.  
192 Bootstrap results indicated that the taxonomic groups involving those three species  
193 shared close evolutionary relationships. The phylogenetic tree of concatenated  
194 sequences was also reconstructed by the maximum-likelihood algorithm (Fig. S2).  
195 Almost the same topology was obtained, and the only exception was the location of  
196 species *S. carassii*, which was supported with relatively low bootstrap values as  
197 described above.

198 **Comparative analysis between MLSA and genomes.** To further validate the  
199 reliability of MLSA, a whole-genome-based phylogenetic tree was constructed, and  
200 correlation analysis was performed among twenty-eight type strains whose genomes  
201 were publicly available. The phylogeny of MLSA yielded a similar topology to that of  
202 core genes, and only a slight difference was observed in the position of species *S.*  
203 *carassii* (Fig. S3). Similarities of the MLSA and *is*DDH were calculated and are  
204 shown in Table S4. The *is*DDH values among distant species were concentrated at  
205 20 %. The *is*DDH values were highly correlated with the MLSA similarities ( $R^2 =$   
206 0.9887) in closely related *Shewanella* species (Fig. 2). Based on the simulative  
207 equation of  $y = 90.01 * \exp(0.001112 * x) - 431.3 * \exp(-0.1927 * x)$ , the 70 % *is*DDH

208 value was equivalent to the 97.3 % MLSA similarity, which could serve as a species  
209 boundary in the genus *Shewanella*.

210 Nevertheless, greater than 97.3 % concatenated sequence similarities were  
211 observed among two sets of species, i.e., *S. algae*-*S. haliotis*-*S. upenei* and *S.*  
212 *japonica*-*S. pacifica*. The corresponding *isDDH* results between those groups of  
213 species were in the range of 83.7-88.9 %, which exceeded the 70 % species threshold  
214 (Fig. 2). The further pairwise ANI results between type strains of *S. algae*, *S. haliotis*  
215 and *S. upenei* were 98.2, 98.1 and 98.2 %, respectively, and the value of that between  
216 species *S. japonica* and *S. pacifica* was 98.8 %. All ANI values were greater than the  
217 boundary of 95 % for species delineation. The genomic analysis based on *isDDH* and  
218 ANI provided compelling evidence for correct taxonomic position, indicating that *S.*  
219 *algae*, *S. haliotis* and *S. upenei* were the same species and *S. pacifica* belonged to the  
220 species *S. japonica*. Additional phenotypic characteristics were detected among these  
221 five strains (Table 2). Minor differences in biochemical results were obtained between  
222 species *S. algae*, *S. haliotis* and *S. upenei*. The phenotypic discrepancies between  
223 species *S. japonica* and *S. pacifica* were discovered in growth conditions and the  
224 assimilation of *N*-acetyl-glucosamine. These results confirmed the conclusion of a  
225 recent report that identified *S. haliotis* as a synonym of *S. algae* according to  
226 whole-genome sequencing. Considering the genetic, genomic and phenotypic  
227 characteristics, species *S. upenei* reported by Kim *et al.* 2011 should be regarded as a  
228 later heterotypic synonym of *S. algae* Simidu *et al.* 1990, meanwhile, *S. pacifica*  
229 Ivanova *et al.* 2004 should be reclassified as a later heterotypic synonym of *S.*  
230 *japonica* Ivanova *et al.* 2001.

231 **Distinct taxonomic clades.** Given the results of sequence diversity, topological  
232 stability and concordance with genomes, the MLSA scheme of six protein-coding  
233 genes (*gyrA*, *gyrB*, *infB*, *recN*, *rpoA* and *topA*) was validated for taxonomic and  
234 evolutionary analysis among the *Shewanella* genus. The concatenated sequences for  
235 fifty-six species after emendation were subjected to construct the split network tree to  
236 explore evolutionary relationships among taxa (Fig. 3). Twelve distinct monophyletic  
237 clades were identified, i.e., Algae, Amazonensis, Aquimarina, Benthica, Colwelliana,



238 Fodinae, Gaetbuli, Hanedai, Japonica, Livingstonensis, Pealeana and Putrefaciens  
239 clades (Table 3). The *Shewanella* species within the same clade shared <4 mol% GC  
240 variation and >84 % MLSA concatenated similarity. There are eight orphan  
241 *Shewanella* species, namely, *S. corallii*, *S. denitrificans*, *S. gelidii*, *S. intestini*, *S.*  
242 *mangrovi*, *S. marina*, *S. sediminis* and *S. waksmanii*, which form a distinct branch  
243 clearly separated from all taxonomic clades in the phylogenetic network, except for *S.*  
244 *sediminis*. Species *S. sediminis* harbored a far evolutionary distance similar to both  
245 Hanedai and Benthica clades and was located on the boundary of clade differentiation.  
246 Combined with the ambiguous relationships between species *S. sediminis* and clades  
247 Hanedai and Benthica in a single HKG phylogenetic tree, *S. sediminis* was considered  
248 an orphan species. Twelve evolutionary clades were always maintained in  
249 phylogenetic trees of individual and concatenated HKGs. There were only slight  
250 differences observed, i.e., species *S. woodyi*-*S. hanedai* in *gyrB*, species *S.*  
251 *colwelliana*-*S. algidipiscicola* and *S. gaetbuli*-*S. aestuarii* in *infB*, and species *S.*  
252 *algidipiscicola*-*S. colwelliana* in *topA*, which were positioned closely but did not  
253 group within one clade in phylogenies.

254 **Population genetics of *Shewanella* species in China.** Eighty-six *Shewanella* strains  
255 isolated from diverse samples were involved in the analysis of sequences and  
256 phylogeny to evaluate the intraspecies relationships and investigate the distribution of  
257 *Shewanella* species in China. As shown in the concatenated phylogenetic tree (Fig. 4),  
258 eighty-six strains were divided into six compact clusters with high bootstrap support  
259 of 100 %. Each cluster was represented by a unique type *Shewanella* strain situated in  
260 Algae and Putrefaciens clades. In comparison with the concatenated phylogenetic tree,  
261 several unexpected locations were observed in the single HKG tree: strain  
262 08MAS2647 in the *S. algae* cluster fell into the *S. chilikensis* cluster in *gyrA*; strains  
263 08MAS2647, 11MAS2711, 11MAS2745 and 11MAS2746 in the *S. algae* cluster  
264 formed a subcluster next to the *S. carassii* cluster in *infB*; strains in *S. algae*; *S.*  
265 *carassii* and *S. chilikensis* clusters exhibited a close affiliation that could not be  
266 separated from each other in *recN*. Although some strains could be grouped into  
267 clusters properly in individual phylogenetic trees, clusters were supported with low

268 bootstrap values, such as *S. algae* cluster in 16S rRNA, *gyrA* and *infB* genes as well as  
269 *S. seohaensis* cluster in *gyrA* and *gyrB* genes (Fig. S4). Hence, concatenated  
270 sequences derived from six HKGs exhibited good performance and robustness in  
271 identifying *Shewanella* strains. Since strains were defined as corresponding species in  
272 the concatenated phylogenetic tree, ranges of intraspecies and interspecies similarities  
273 for genes among the fifty-six validated *Shewanella* species were measured and shown  
274 in Fig. 5. The overlap between the intraspecies and interspecies similarities were  
275 observed among genes of 16S rRNA, *gyrA*, *infB*, *recN*, *rpoA* and *topA*. A small  
276 interval was detected in the *gyrB* gene with only 0.1 % variance. A notable gap was  
277 discovered in concatenated sequences. The minimum intraspecies similarity was  
278 found among *S. seohaensis* strains (97.8 %), and the maximum interspecies similarity  
279 existed between species *S. chilikensis* and *S. indica* (96.8 %), which differed by 1 %  
280 variation, corresponding to approximately 40 bp divergences.

281 Eighty-six *Shewanella* strains collected from China were subjected to define  
282 species via the MLSA approach. The most dominant *Shewanella* species was  
283 identified as *S. algae* (66.3 %), followed by *S. xiamenensis* (11.6 %), *S. chilikensis*  
284 (9.3 %), *S. indica* (8.1 %), *S. seohaensis* (3.5 %), and *S. carassii* (1.2 %). Except for  
285 the species *S. seohaensis*, which was only isolated from the environment, the  
286 remaining five species were relevant to clinical patients. It is noteworthy that species  
287 *S. algae*, *S. xiamenensis*, *S. chilikensis*, and *S. indica* were also discovered in food  
288 samples consisting of both marine products and cooked food for sale. Consequently,  
289 MLSA as a proper discrimination for *Shewanella* species played a significant role in  
290 public health and regular surveillance.

## 291 **DISCUSSION**

292 In this study, the MLSA scheme, based on six HKGs (*gyrA*, *gyrB*, *infB*, *recN*, *rpoA*  
293 and *topA*), was established for the first time to carry out efficient classification, reflect  
294 evolutionary relationships and delineate population biology in the genus *Shewanella*.  
295 Fifty-nine recognized type strains and eighty-six Chinese strains were investigated to  
296 explore the interspecies and intraspecies sequence diversity and phylogenetic  
297 topology in *Shewanella* species.

298 Previously, the 16S rRNA gene was applied as a traditional genetic marker among  
299 the genus *Shewanella* (17, 36, 37). However, the resolving power of the 16S rRNA  
300 gene was restricted with fewer parsimony informative sites and lower nucleotide  
301 diversity values. A narrow range of sequence variation was observed, and multiple  
302 pairs of *Shewanella* species shared greater than 99 % similarity. The latest proposed  
303 threshold of 98.65 % for 16S rRNA was insufficient to differentiate species in the  
304 genus *Shewanella* (38). Additionally, the existence of sequence variation among *rrn*  
305 operons would perplex the species definition and evolutionary analysis for taxa (39).  
306 Hence, protein-coding genes with a greater genetic resolution were utilized to  
307 determine the taxonomic position of *Shewanella* species.

308 Comparable analysis was performed among six HKGs (*gyrA*, *gyrB*, *infB*, *recN*,  
309 *rpoA* and *topA*). Unexpected classification of tested strains was discerned in the *gyrA*  
310 and *infB* genes for the high biological diversity among *S. algae* strains. The high  
311 interspecies similarities of those HKGs were generated, making them difficult to  
312 discern closely related species. The *gyrB* gene has always been used as a basic  
313 detection for novel *Shewanella* species identification (17-20). However, the criterion  
314 for *gyrB* analysis was not well established, and the boundary between interspecies and  
315 intraspecies similarities was inconspicuous. The *recN* gene was the most variable  
316 HKG, with the greatest rates of parsimony informative sites and the widest spectrum  
317 of interspecies similarity. Although the *recN* gene was unsuccessful in making a  
318 distinction in the Algae clade, the effective discrimination was proven by high  
319 sequence substitution rates in the majority of species. The *rpoA* gene was more  
320 conserved than other HKGs with limited variable sites. None of the tested strains were  
321 phylogenetically located at unexpected positions, and only slight overlap was detected  
322 between intraspecies and interspecies ranges. The *topA* gene possessed a high genetic  
323 divergence next to the *recN* gene. The unstable taxonomic subtree with a low  
324 bootstrap value was discovered in the Colwelliana clade. The various evolutionary  
325 rates and inconsistencies of phylogenetic topology were discovered in those six loci.  
326 Therefore, the concatenated sequences with integrated and sufficient information  
327 should be taken into account to obtain the exact *Shewanella* species classification.

328 The concatenation of six HKGs demonstrated enough resolution power to discern  
329 *Shewanella* species in regard to variable sites, sequence divergences and independent  
330 branches. A notable gap between the ranges of interspecies and intraspecies  
331 similarities was favorable for defining the strains unambiguously at the species level,  
332 and 97.3 % MLSA similarity was proposed as a species threshold in the genus  
333 *Shewanella*. The neighbor-joining phylogenetic tree indicated that all validated  
334 species positioned at a distinct branch were clearly separated from closely related taxa.  
335 The stability of the phylogenetic tree was proven by bootstrap and topology analysis.  
336 The concatenated sequences phylogeny was supported by high bootstrap values  
337 among interspecies having a significant advantage over all individual genes. The  
338 phylogenetic tree grouped *Shewanella* strains into intraspecies clusters and taxonomic  
339 clades with almost 100 % bootstrap support. The use of the maximum-likelihood  
340 method had a slight impact on the tree topology. The reliability of the MLSA scheme  
341 was validated by comparison with genomic sequences. The identical phylogenies  
342 were constructed by concatenated sequences of six HKGs and core genes. A high  
343 correlation between the similarities of the MLSA and *is*DDH was discovered.  
344 Combined with the analysis of resolution, stability and reliability for nucleotide  
345 sequences and phylogenies, the MLSA approach of six HKGs (*gyrA*, *gyrB*, *infB*, *recN*,  
346 *rpoA* and *topA*) showed a significant performance for the precise classification of  
347 *Shewanella* species.

348 Under comprehensive analysis, the exceptional cases were only observed among  
349 two sets of recognized species, i.e., species *S. algae*-*S. haliotis*-*S. upenei* and *S.*  
350 *japonica*-*S. pacifica*. Based on molecular, genomic and phenotypic analyses, these  
351 five species were reclassified correctly, and the taxonomic structure of the *Shewanella*  
352 genus was refined. It is noteworthy that previous studies proposing those five novel  
353 species depended largely on the individual sequence analysis of 16S rRNA,  
354 experimental DDH and biochemical tests (7, 40-42). The high sequence similarities of  
355 16S rRNA between their phylogenetic neighbors have already been observed, and the  
356 results of wet-lab DDH below 70 % were regarded as the gold standard for species  
357 classification (43). However, the experimental DDH was hard to reproduce

358 completely by different laboratories; thus, the digital DDH based on the bacterial  
359 genomes was recommended in microbial systematics (23, 24). The phenotypic traits  
360 are inclined to be conservative among the *Shewanella* genus, and limited  
361 characteristics are suitable to discriminate *Shewanella* species. The deviation of  
362 biochemical results could be attributed to the different manual procedures and  
363 bacterial growth statuses. The phenotypic discrepancies in growth conditions and the  
364 carbon source utilization observed among species *S. japonica* and *S. pacifica* were  
365 also reported in the reclassification of species *S. affinis* and *S. colwelliana* (44).  
366 Therefore, the accurate molecular method of MLSA is considered a promising  
367 alternative tool for species identification and is superior to genomic analysis in terms  
368 of high efficiency and low cost.

369 In addition, the MLSA scheme provided a portable and robust system to reflect  
370 evolutionary relationships for the genus *Shewanella*. Twelve distinct phylogenetic  
371 clades were proposed with identical G+C contents and greater nucleotide similarity in  
372 concatenated sequences. The Chinese strains collected from clinical specimens and  
373 routine monitoring were located on Algae and Putrefaciens clades. These results  
374 indicated that species in monophyletic clades have a tendency to share a close genetic  
375 relationship, tracing back to common ancestry, and occupy similar geographical  
376 positions. These clades could be almost retrieved from individual HKG phylogenies,  
377 further elucidating the accurate and stable evolutionary structure in *Shewanella* taxon.  
378 Eight orphan species separated from all phylogenetic clades were defined. Attempts to  
379 involve the remaining species and identify the novel *Shewanella* species was  
380 conducive to exploring taxonomic positions for these species. In summary, the  
381 concatenated phylogeny provided significant insight into the evolutionary structure of  
382 the *Shewanella* genus for the first time.

383 Furthermore, it has been verified that *Shewanella* species, as marine pathogens, are  
384 associated with human diseases (12). Misidentifications to the species level were  
385 fairly common in clinical diagnoses due to the poor discernment system (45). In this  
386 study, eighty-six *Shewanella* strains collected from the environment, food and clinical  
387 samples in China were mainly defined as *S. algae*, followed by *S. xiamenensis*, *S.*

388 *chilikensis*, *S. indica*, *S. seohaensis*, and *S. carassii* via the MLSA scheme. Five  
389 *Shewanella* species were verified to have connection with the clinic, including *S.*  
390 *algae*, *S. carassii*, *S. chilikensis*, *S. indica* and *S. xiamenensis*. It was likely that some  
391 *Shewanella* pathogens identified as *S. algae* in previous studies were believed to be *S.*  
392 *carassii*, *S. chilikensis*, and *S. indica* for their high 16S rRNA similarities. Apart from  
393 species *S. carassii*, four species were also frequently collected from marine products  
394 as well as cooked food for sale. It was reported that a common mechanism causing  
395 *Shewanella* infections was ascribed to the consumption of seafood or raw fish (12).  
396 Therefore, more attention is needed to reinforce continuous surveillance for the genus  
397 *Shewanella* by the MLSA approach in the processes of clinical diagnosis and food  
398 sales.

399

#### 400 **ACKNOWLEDGMENTS**

401 This work was supported by grants from the National Natural Science Foundation of  
402 China (31570134) and the National Sci-Tech Key Project (2018ZX10102001,  
403 2018ZX10734404, 2018ZX10713001-002, 2018ZX10713003-002) from the Ministry  
404 of Health, China.

405

#### 406 **COMPETING INTERESTS**

407 The authors have declared that no competing interests exist.

408

#### 409 **REFERENCES**

- 410 1. MacDonell MT, Colwell RR. 1985. Phylogeny of the *Vibrionaceae* and recommendation for  
411 two new genera, *Listonella* and *Shewanella*. *Syst. Appl. Microbiol.* 6:171–182.
- 412 2. Bowman JP. 2005. Genus XIII. *Shewanella* MacDonell and Colwell 1986, 355VP (Effective  
413 publication: MacDonell and Colwell 1985,180). In *Bergey's Manual of Systematic*  
414 *Bacteriology*, 2nd edn, vol 2, Part B, pp 480–491 Edited by D J Brenner, N R Krieg, J T Staley  
415 & G M Garrity New York: Springer.
- 416 3. Venkateswaran K, Moser DP, Dollhopf ME, Lies DP, Saffarini DA, MacGregor BJ,  
417 Ringelberg DB, White DC, Nishijima M, Sano H, Burghardt J, Stackebrandt E, Nealson KH.  
418 1999. Polyphasic taxonomy of the genus *Shewanella* and description of *Shewanella*  
419 *oneidensis* sp. nov. *Int. J. Syst. Evol. Microbiol.* 49 Pt 2:705-24.
- 420 4. Gauthier G, Gauthier M, Christen R. 1995. Phylogenetic analysis of the genera *Alteromonas*,

- 421 *Shewanella*, and *Moritella* using genes coding for small-subunit rRNA sequences and division  
422 of the genus *Alteromonas* into two genera, *Alteromonas* (emended) and *Pseudoalteromonas*  
423 gen. nov., and proposal of twelve new species combinations. Int. J. Syst. Evol. Microbiol.  
424 45:755-61.
- 425 5. Huang J, Sun B, Zhang X. 2010. *Shewanella xiamenensis* sp. nov., isolated from coastal sea  
426 sediment. Int. J. Syst. Evol. Microbiol.60:1585-9.
- 427 6. Park SC, Baik KS, Kim MS, Kim D, Seong CN. 2009. *Shewanella marina* sp. nov., isolated  
428 from seawater. Int. J. Syst. Evol. Microbiol.59:1888-94.
- 429 7. Kim D, Baik KS, Kim MS, Jung BM, Shin TS, Chung GH, Rhee MS, Seong CN. 2007.  
430 *Shewanella haliotis* sp. nov., isolated from the gut microflora of abalone, *Haliotis discus*  
431 *hannai*. Int. J. Syst. Evol. Microbiol.57:2926-31.
- 432 8. Hirota K, Nodasaka Y, Orikasa Y, Okuyama H, Yumoto I. 2005. *Shewanella pneumatophori* sp.  
433 nov., an ecosapentaenoic acid-producing marine bacterium isolated from the intestines of  
434 Pacific mackerel (*Pneumatophorus japonicus*). Int. J. Syst. Evol. Microbiol.55:2355-9.
- 435 9. Boukhalfa H, Icopini GA, Reilly SD, Neu MP. 2007. Plutonium(IV) reduction by the  
436 metal-reducing bacteria *Geobacter metallireducens* GS15 and *Shewanella oneidensis* MR1.  
437 Appl. Environ. Microbiol. 73:5897-903.
- 438 10. Kouzuma A, Kasai T, Hirose A, Watanabe K. 2015. Catabolic and regulatory systems in  
439 *Shewanella oneidensis* MR-1 involved in electricity generation in microbial fuel cells. Front.  
440 Microbiol. 6:609.
- 441 11. Nimje VR, Chen CY, Chen HR, Chen CC, Huang YM, Tseng MJ, Cheng KC, Chang YF. 2012.  
442 Comparative bioelectricity production from various wastewaters in microbial fuel cells using  
443 mixed cultures and a pure strain of *Shewanella oneidensis*. Bioresour Technol. 104:315-23.
- 444 12. Janda JM, Abbott SL. 2014. The genus *Shewanella*: from the briny depths below to human  
445 pathogen. Crit. Rev. Microbiol. 40:293-312.
- 446 13. Liu PY, Lin CF, Tung KC, Shyu CL, Wu MJ, Liu JW, Chang CS, Chan KW, Huang JA, Shi  
447 ZY. 2013. Clinical and microbiological features of *Shewanella* bacteremia in patients with  
448 hepatobiliary disease. Intern Med. 52:431-8.
- 449 14. Pagani L, Lang A, Vedovelli C, Moling O, Rimenti G, Pristera R, Mian P. 2003. Soft tissue  
450 infection and bacteremia caused by *Shewanella putrefaciens*. J. Clin. Microbiol. 41:2240-1.
- 451 15. Yarza P, Yilmaz P, Pruesse E, Glockner FO, Ludwig W, Schleifer KH, Whitman WB, Euzéby J,  
452 Amann R, Rossello-Mora R. 2014. Uniting the classification of cultured and uncultured  
453 bacteria and archaea using 16S rRNA gene sequences. Nat. Rev. Microbiol. 12:635-45.
- 454 16. Glaeser SP, Kampfer P. 2015. Multilocus sequence analysis (MLSA) in prokaryotic taxonomy.  
455 Syst. Appl. Microbiol. 38:237-45.
- 456 17. Fang Y, Wang Y, Liu Z, Lu B, Dai H, Kan B, Wang D. 2017. *Shewanella carassii* sp. nov.,  
457 isolated from surface swabs of crucian carp and faeces of a diarrhoea patient. Int. J. Syst. Evol.  
458 Microbiol.67:5284-5289.
- 459 18. Kim JY, Yoo HS, Lee DH, Park SH, Kim YJ, Oh DC. 2016. *Shewanella algicola* sp. nov., a  
460 marine bacterium isolated from brown algae. Int. J. Syst. Evol. Microbiol.66:2218-24.
- 461 19. Park HY, Jeon CO. 2013. *Shewanella aestuarii* sp. nov., a marine bacterium isolated from a  
462 tidal flat. Int. J. Syst. Evol. Microbiol.63:4683-90.
- 463 20. Sung HR, Yoon JH, Ghim SY. 2012. *Shewanella dokdonensis* sp. nov., isolated from seawater.  
464 Int. J. Syst. Evol. Microbiol.62:1636-43.

- 465 21. Bozal N, Montes MJ, Tudela E, Jimenez F, Guinea J. 2002. *Shewanella frigidimarina* and  
466 *Shewanella livingstonensis* sp. nov. isolated from Antarctic coastal areas. Int. J. Syst. Evol.  
467 Microbiol.52:195-205.
- 468 22. Miyazaki M, Nogi Y, Usami R, Horikoshi K. 2006. *Shewanella surugensis* sp. nov.,  
469 *Shewanella kaireitica* sp. nov. and *Shewanella abyssi* sp. nov., isolated from deep-sea  
470 sediments of Suruga Bay, Japan. Int. J. Syst. Evol. Microbiol.56:1607-13.
- 471 23. Auch AF, von Jan M, Klenk HP, Goker M. 2010. Digital DNA-DNA hybridization for  
472 microbial species delineation by means of genome-to-genome sequence comparison. Stand  
473 Genomic Sci. 2:117-34.
- 474 24. Lee, I., Kim, Y. O., Park, S. C., Chun, J. (2015) OrthoANI: An improved algorithm and  
475 software for calculating average nucleotide identity. Int. J. Syst. Evol. Microbiol.  
476 66,1100-1103.
- 477 25. Gabriel MW, Matsui GY, Friedman R, Lovell CR. 2014. Optimization of multilocus sequence  
478 analysis for identification of species in the genus *Vibrio*. Appl. Environ. Microbiol.  
479 80:5359-65.
- 480 26. Kemp KM, Westrich JR, Alabady MS, Edwards ML, Lipp EK. 2018. Abundance and  
481 Multilocus Sequence Analysis of *Vibrio* Bacteria Associated with Diseased Elkhorn Coral  
482 (*Acropora palmata*) of the Florida Keys. Appl. Environ. Microbiol. 84. e01035-17.
- 483 27. Martinez-Murcia AJ, Monera A, Saavedra MJ, Oncina R, Lopez-Alvarez M, Lara E, Figueras  
484 MJ. 2011. Multilocus phylogenetic analysis of the genus *Aeromonas*. Syst. Appl. Microbiol.  
485 34:189-99.
- 486 28. Sakamoto M, Ohkuma M. 2011. Identification and classification of the genus *Bacteroides* by  
487 multilocus sequence analysis. Microbiology 157:3388-97.
- 488 29. Huo YB, Chan Y, Lacap-Bugler DC, Mo S, Woo PC, Leung WK, Watt RM. 2017. Multilocus  
489 Sequence Analysis of Phylogroup 1 and 2 Oral Treponeme Strains. Appl. Environ.  
490 Microbiol.83. e02499-16.
- 491 30. Leon MJ, Sanchez-Porro C, de la Haba RR, Llamas I, Ventosa A. 2014. *Larsenia salina* gen.  
492 nov., sp. nov., a new member of the family *Halomonadaceae* based on multilocus sequence  
493 analysis. Syst. Appl. Microbiol. 37:480-7.
- 494 31. Weisburg WG, Barns SM, Pelletier DA, Lane DJ. 1991. 16S ribosomal DNA amplification for  
495 phylogenetic study. J. Bacteriol. 173:697-703.
- 496 32. Yamamoto S, Harayama S. 1995. PCR Amplification and Direct Sequencing of *gyrB* Genes  
497 with Universal Primers and Their Application to the Detection and Taxonomic Analysis of  
498 *Pseudomonas putida* Strains. Appl. Environ. Microbiol. 61:3768.
- 499 33. Brosius J, Palmer ML, Kennedy PJ, Noller HF. 1978. Complete nucleotide sequence of a 16S  
500 ribosomal RNA gene from *Escherichia coli*. Proc. Natl. Acad. Sci. U S A. 75:4801-5.
- 501 34. Tamura K, Stecher G, Peterson D, Filipski A, Kumar S. 2013. MEGA6: Molecular  
502 Evolutionary Genetics Analysis version 6.0. Mol. Biol. Evol. 30:2725-9.
- 503 35. Librado P, Rozas J. 2009. DnaSP v5: a software for comprehensive analysis of DNA  
504 polymorphism data. Bioinformatics 25:1451-2.
- 505 36. Sravan Kumar R, Sasi Jyothsna TS, Sasikala C, Seong CN, Lim CH, Park SC, Ramana Ch V.  
506 2010. *Shewanella fodinae* sp. nov., isolated from a coal mine and from a marine lagoon. Int. J.  
507 Syst. Evol. Microbiol.60:1649-54.
- 508 37. Ivanova EP, Nedashkovskaya OI, Sawabe T, Zhukova NV, Frolova GM, Nicolau DV,



- 509 Mikhailov VV, Bowman JP. 2004. *Shewanella affinis* sp. nov., isolated from marine  
510 invertebrates. *Int. J. Syst. Evol. Microbiol.*54:1089-93.
- 511 38. Kim M, Oh HS, Park SC, Chun J. 2014. Towards a taxonomic coherence between average  
512 nucleotide identity and 16S rRNA gene sequence similarity for species demarcation of  
513 prokaryotes. *Int. J. Syst. Evol. Microbiol.*64:346-51.
- 514 39. Sun DL, Jiang X, Wu QL, Zhou NY. 2013. Intragenomic heterogeneity of 16S rRNA genes  
515 causes overestimation of prokaryotic diversity. *Appl. Environ. Microbiol.* 79:5962-9.
- 516 40. Kim KK, Kim YO, Park S, Kang SJ, Nam BH, Kim DN, Oh TK, Yoon JH. 2011. *Shewanella*  
517 *upenei* sp. nov., a lipolytic bacterium isolated from bensasi goatfish *Upeneus bensasi*. *J.*  
518 *Microbiol.* 49:381-6.
- 519 41. Ivanova EP, Gorshkova NM, Bowman JP, Lysenko AM, Zhukova NV, Sergeev AF, Mikhailov  
520 VV, Nicolau DV. 2004. *Shewanella pacifica* sp. nov., a polyunsaturated fatty acid-producing  
521 bacterium isolated from sea water. *Int. J. Syst. Evol. Microbiol.*54:1083-7.
- 522 42. Ivanova EP, Sawabe T, Gorshkova NM, Svetashev VI, Mikhailov VV, Nicolau DV, Christen R.  
523 2001. *Shewanella japonica* sp. nov. *Int. J. Syst. Evol. Microbiol.*51:1027-33.
- 524 43. Wayne LG, Brenner DJ, Colwell RR, Grimont PAD, Kandler O, Krichevsky MI, Moore LH,  
525 Moore WEC, Murray RGE, authors o. 1987. International Committee on Systematic  
526 Bacteriology. Report of the ad hoc committee on reconciliation of approaches to bacterial  
527 systematics. *Int. J. Syst. Bacteriol.* 37:463–464.
- 528 44. Satomi M, Vogel BF, Venkateswaran K, Gram L. 2007. Description of *Shewanella*  
529 *glacialipiscicola* sp. nov. and *Shewanella algidipiscicola* sp. nov., isolated from marine fish of  
530 the Danish Baltic Sea, and proposal that *Shewanella affinis* is a later heterotypic synonym of  
531 *Shewanella colwelliana*. *Int. J. Syst. Evol. Microbiol.*57:347-52.
- 532 45. Sumathi BG, Kumarswamy SR, Amritam U, Arjunan R. 2014. *Shewanella algae*: First case  
533 report of the fast emerging marine pathogen from squamous cell carcinoma patient in India.  
534 *South Asian J Cancer* 3:188-9.
- 535

536 **Table 1.** Nucleotide sequence diversity of fifty-nine *Shewanella* type strains.

| Locus       | Length (bp) | Parsimony informative sites |      | Nucleotide diversity, Pi | Similarities (%) |      | Ka/Ks |
|-------------|-------------|-----------------------------|------|--------------------------|------------------|------|-------|
|             |             | No.                         | %    |                          | Range            | Mean |       |
| 16S rRNA    | 1434        | 148                         | 10.3 | 0.043                    | 89.8-100         | 95.0 | NA    |
| <i>gyrA</i> | 498         | 229                         | 46.0 | 0.223                    | 68.3-100         | 77.7 | 0.117 |
| <i>gyrB</i> | 1110-1119   | 492                         | 44.0 | 0.194                    | 73.2-99.9        | 80.8 | 0.089 |
| <i>infB</i> | 663         | 289                         | 43.6 | 0.193                    | 73.5-100         | 80.7 | 0.105 |
| <i>recN</i> | 633-636     | 457                         | 71.9 | 0.360                    | 52.2-99.8        | 64.0 | 0.275 |
| <i>rpoA</i> | 615         | 221                         | 35.9 | 0.125                    | 79.7-100         | 87.5 | 0.052 |
| <i>topA</i> | 657-660     | 358                         | 54.2 | 0.264                    | 65.9-100         | 73.5 | 0.168 |
| MLSA        | 4176-4191   | 2046                        | 48.8 | 0.223                    | 71.1-99.9        | 77.7 | 0.143 |

537

538 **Table 2.** Distinctive phenotypic characteristics between five controversial *Shewanella* strains.

| Characteristic               | 1    | 2    | 3    | 4    | 5    |
|------------------------------|------|------|------|------|------|
| Growth at/in                 |      |      |      |      |      |
| 4 °C                         | -    | -    | -    | -    | +    |
| 35 °C                        | +    | +    | +    | +    | -    |
| 0 % (w/v) NaCl               | +    | +    | +    | +    | -    |
| 6 % (w/v) NaCl               | +    | +    | +    | -    | +    |
| Ornithine decarboxylase      | +    | +    | +    | -    | -    |
| Utilization of               |      |      |      |      |      |
| D-glucose                    | +    | -    | -    | +    | +    |
| D-maltose                    | -    | -    | -    | +    | +    |
| <i>N</i> -acetyl-glucosamine | +    | +    | +    | +    | -    |
| DNA G+C content (mol%)       | 53.1 | 52.9 | 53.1 | 40.8 | 40.7 |

Strains: 1, *S. algae* JCM 21037<sup>T</sup>; 2, *S. haliotis* KCTC 12896<sup>T</sup>; 3, *S. upenei* KCTC 22806<sup>T</sup>; 4, *S. japonica* KMM 3299<sup>T</sup>; 5, *S. pacifica* KMM 3597<sup>T</sup>. +, Positive; -, negative.

539

540 **Table 3.** G+C content and MLSA concatenated similarity of clades in *Shewanella* species.

| Clade           | Described species included                                                                                                                                                                                                                  | No. of species | G+C content (mol%)* | MLSA concatenated similarity (%) |
|-----------------|---------------------------------------------------------------------------------------------------------------------------------------------------------------------------------------------------------------------------------------------|----------------|---------------------|----------------------------------|
| Algae           | <i>S. algae</i> , <i>S. carassii</i> , <i>S. chilikensis</i> and <i>S. indica</i>                                                                                                                                                           | 4              | 53-54               | 94.8-96.6                        |
| Amazonensis     | <i>S. amazonensis</i> and <i>S. litorisediminis</i>                                                                                                                                                                                         | 2              | 54                  | 91.2                             |
| Aquimarina      | <i>S. aquimarina</i> , <i>S. loihica</i> and <i>S. marisflavi</i>                                                                                                                                                                           | 3              | 50-53               | 89.0-93.4                        |
| Benthica        | <i>S. benthica</i> , <i>S. psychrophila</i> and <i>S. violacea</i>                                                                                                                                                                          | 3              | 47-49               | 90.6-94.6                        |
| Colwelliana     | <i>S. colwelliana</i> and <i>S. algidipiscicola</i>                                                                                                                                                                                         | 2              | 46-47               | 85.4                             |
| Fodinae         | <i>S. fodinae</i> and <i>S. dokdonensis</i>                                                                                                                                                                                                 | 2              | 50-51               | 87.4                             |
| Gaetbuli        | <i>S. gaetbuli</i> and <i>S. aestuarii</i>                                                                                                                                                                                                  | 2              | 43                  | 84.3                             |
| Hanedai         | <i>S. hanedai</i> and <i>S. woodyi</i>                                                                                                                                                                                                      | 2              | 44-46               | 87.0                             |
| Japonica        | <i>S. japonica</i> , <i>S. electrodiphila</i> and <i>S. olleyana</i>                                                                                                                                                                        | 3              | 43                  | 87.7-89.6                        |
| Livingstonensis | <i>S. livingstonensis</i> , <i>S. algicola</i> , <i>S. arctica</i> , <i>S. basaltis</i> , <i>S. inventionis</i> and <i>S. vesiculosa</i>                                                                                                    | 6              | 43-44               | 85.1-91.8                        |
| Pealeana        | <i>S. pealeana</i> , <i>S. fidelis</i> , <i>S. halifaxensis</i> , <i>S. kaireitica</i> , <i>S. marinintestina</i> , <i>S. piezotolerans</i> , <i>S. pneumatophori</i> , <i>S. sairae</i> and <i>S. schlegeliana</i>                         | 9              | 44-46               | 84.0-93.5                        |
| Putrefaciens    | <i>S. putrefaciens</i> , <i>S. baltica</i> , <i>S. decolorationis</i> , <i>S. glacialipiscicola</i> , <i>S. hafniensis</i> , <i>S. morhuae</i> , <i>S. oneidensis</i> , <i>S. profunda</i> , <i>S. seohaensis</i> and <i>S. xiamenensis</i> | 10             | 46-50               | 84.6-96.3                        |

\*Calculated based on the concatenated sequences of six HKGs.

541

542

543 **FIGURE LEGENDS**

544 **Figure 1.** Phylogenetic tree reconstructed by the neighbor-joining method based on  
545 concatenated six gene sequences (*gyrA*, *gyrB*, *infB*, *recN*, *rpoA* and *topA*, 4191 bp) of  
546 fifty-nine *Shewanella* type strains. The robustness of tree topologies was evaluated  
547 with 1000 bootstrap replications, and values greater than 70 % were shown at nodes  
548 of branches. The scale bar indicates substitutions per site. The type strains of  
549 *Aeromonas hydrophila* ATCC 7966<sup>T</sup>, *Escherichia coli* JCM 1649<sup>T</sup> and *Vibrio*  
550 *cholerae* ATCC 14035<sup>T</sup> served as outgroups.

551

552 **Figure 2.** The correlation analysis between similarities of *isDDH* and MLSA for the  
553 genus *Shewanella*. The vertical line indicates a 70 % *isDDH* threshold, and the  
554 horizontal line indicates the corresponding 97.3 % MLSA similarity. The four points  
555 greater than the species boundary are marked in red.

556

557 **Figure 3.** Concatenated split network tree based on six gene loci. The *gyrA*, *gyrB*,  
558 *infB*, *recN*, *rpoA* and *topA* gene sequences from fifty-six validated *Shewanella* species  
559 were concatenated and reconstructed using the SplitsTree 4 program. Twelve distinct  
560 clades were identified and indicated by a red line.

561

562 **Figure 4.** Phylogenetic tree reconstructed by the neighbor-joining method based on  
563 concatenated six gene sequences (*gyrA*, *gyrB*, *infB*, *recN*, *rpoA* and *topA*, 4191 bp) of  
564 eighty-six *Shewanella* tested strains and twenty-six related type strains. The strain  
565 number of tested strains for each compact cluster (black triangle) is shown in  
566 parentheses. The robustness of tree topologies was evaluated with 1000 bootstrap  
567 replications, and values greater than 70 % were shown at nodes of branches. The scale  
568 bar indicates substitutions per site.

569

570 **Figure 5.** Intraspecies and interspecies similarities of 16S rRNA, six HKGs and  
571 MLSA for fifty-six validated *Shewanella* species. The ranges of similarity are  
572 displayed in black (intraspecies) and gray (interspecies).

573

bioRxiv preprint doi: <https://doi.org/10.1101/512624>; this version posted January 6, 2019. The copyright holder for this preprint (which was not certified by peer review) is the author/funder. All rights reserved. No reuse allowed without permission.

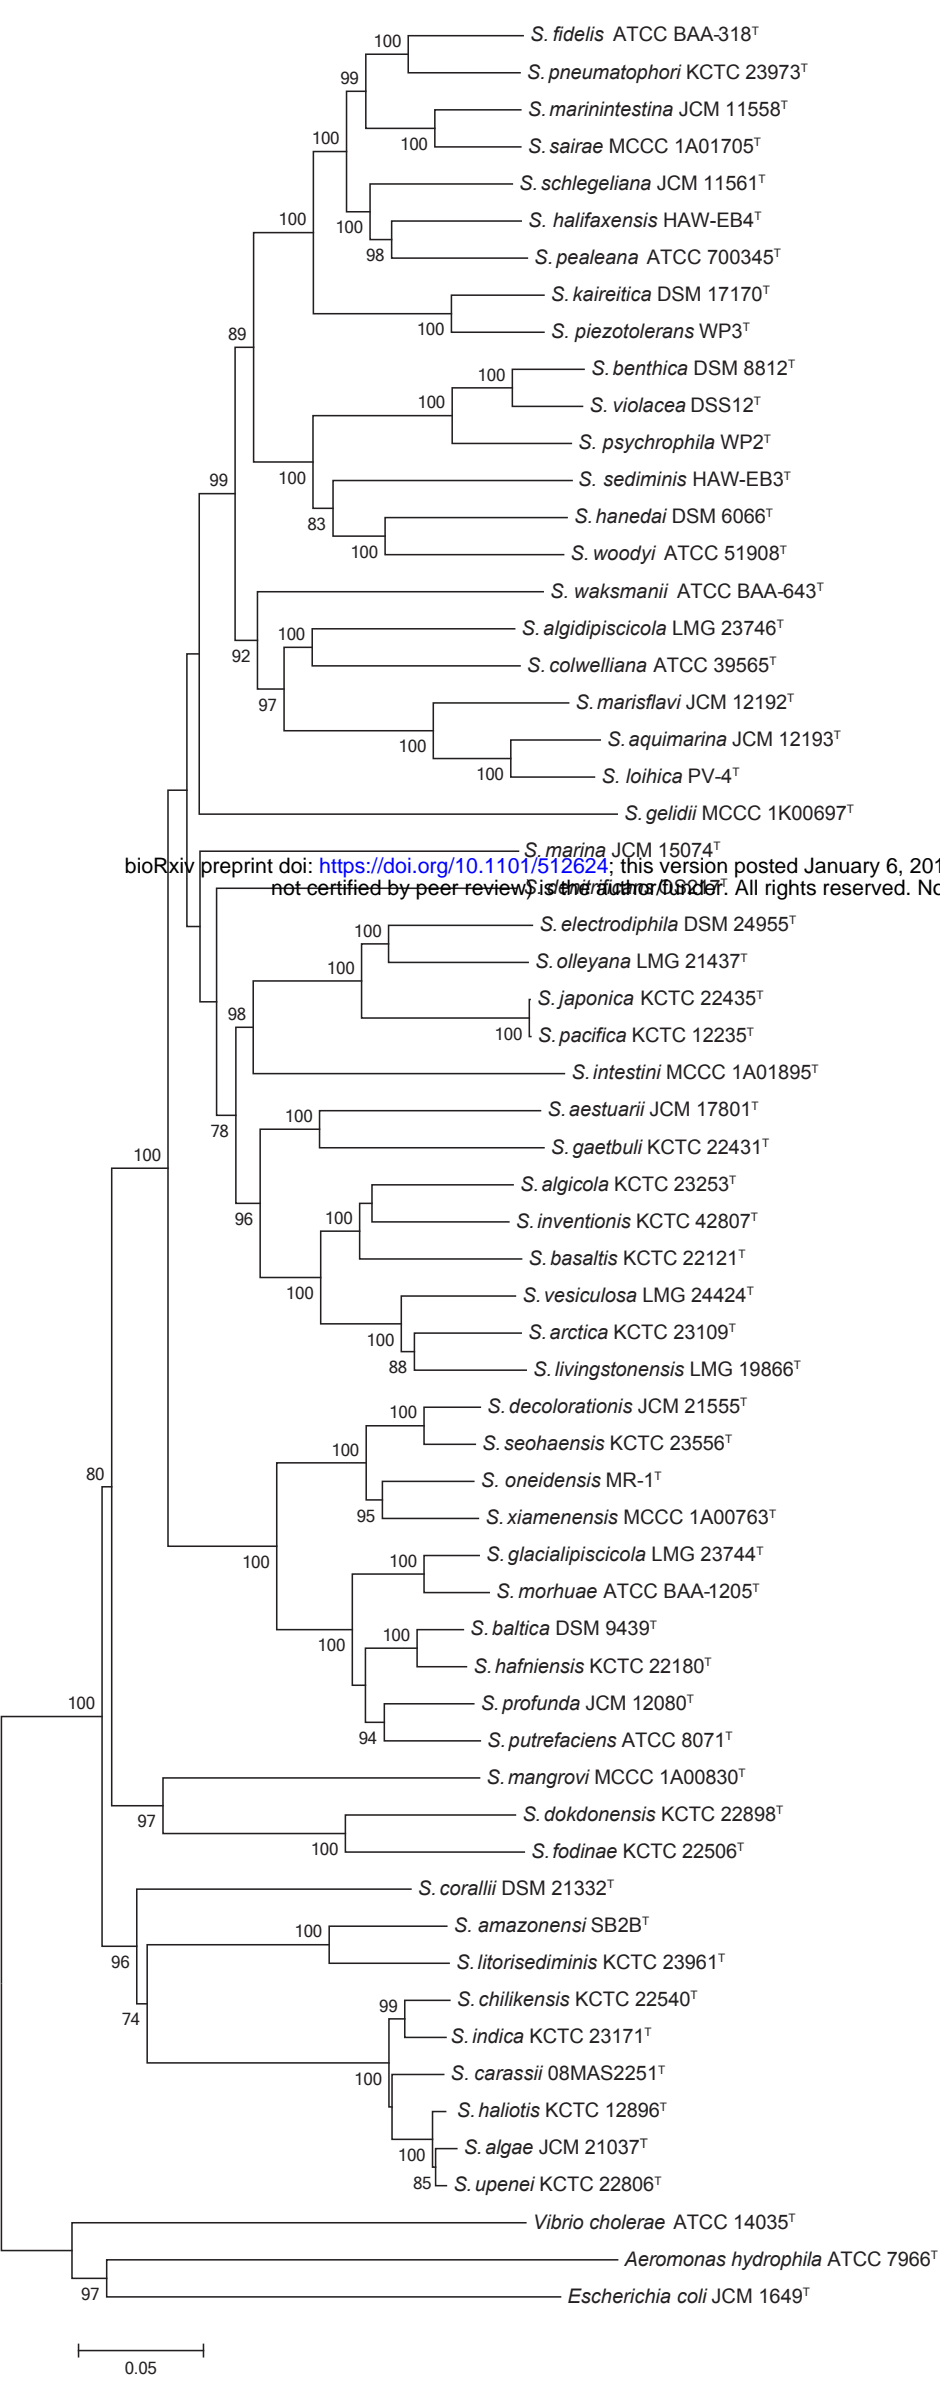

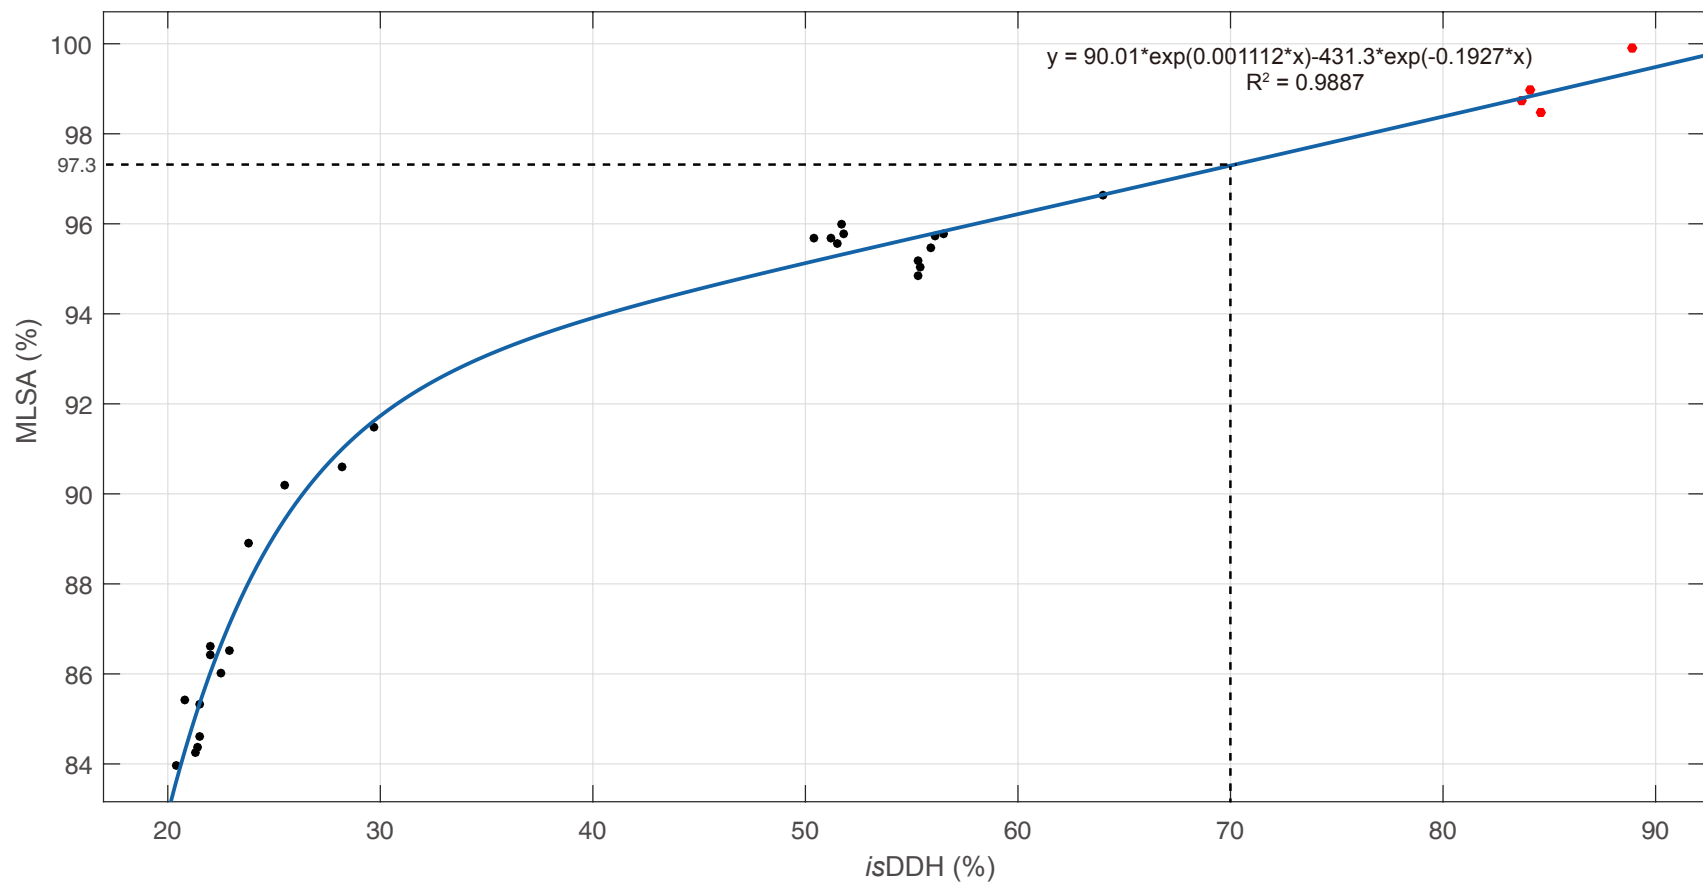

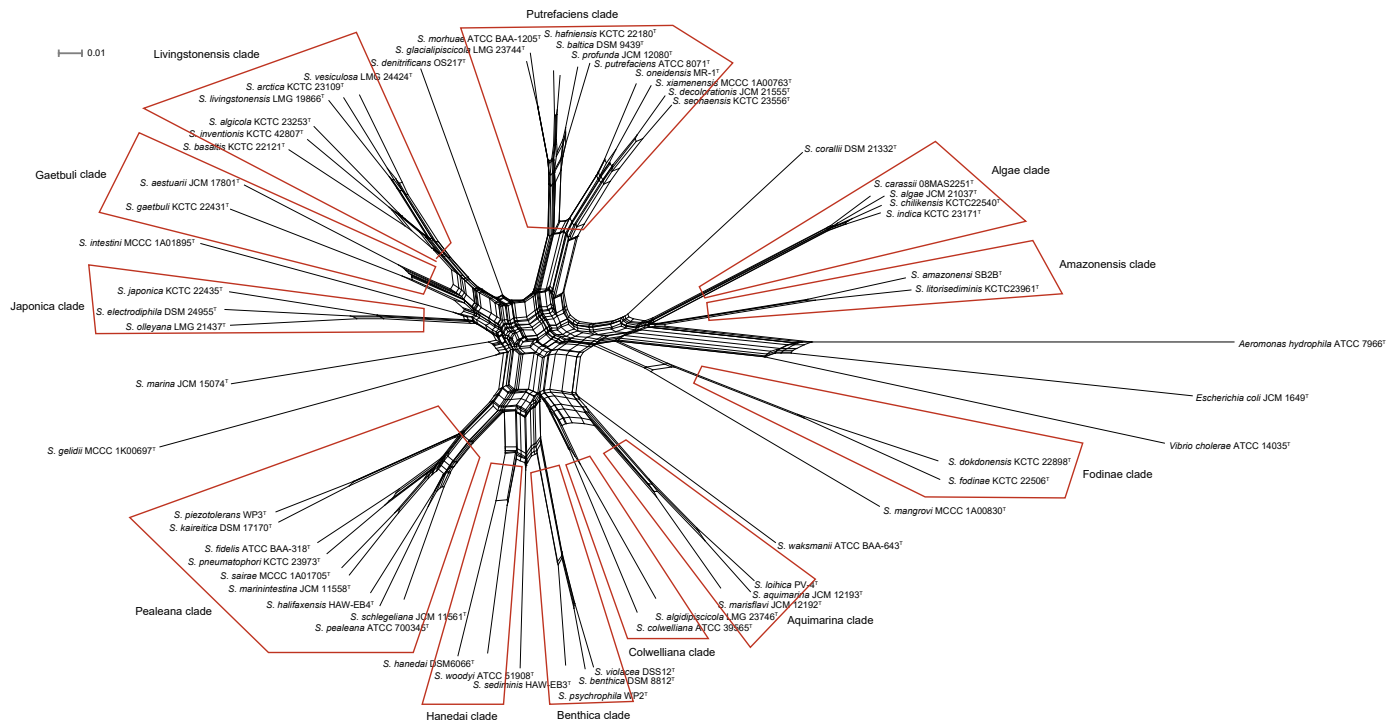

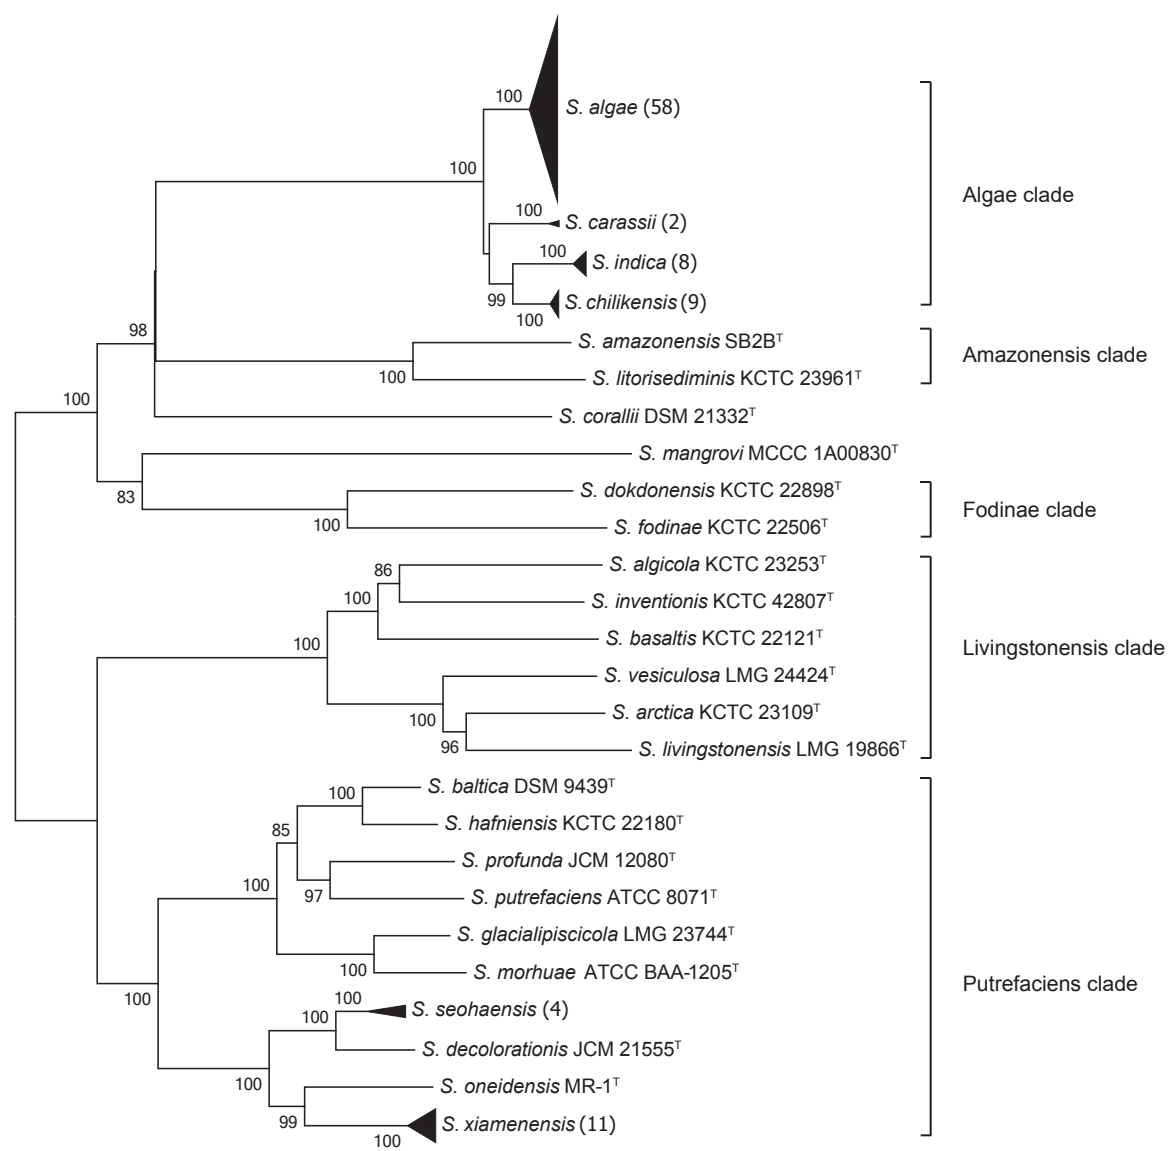

0.02

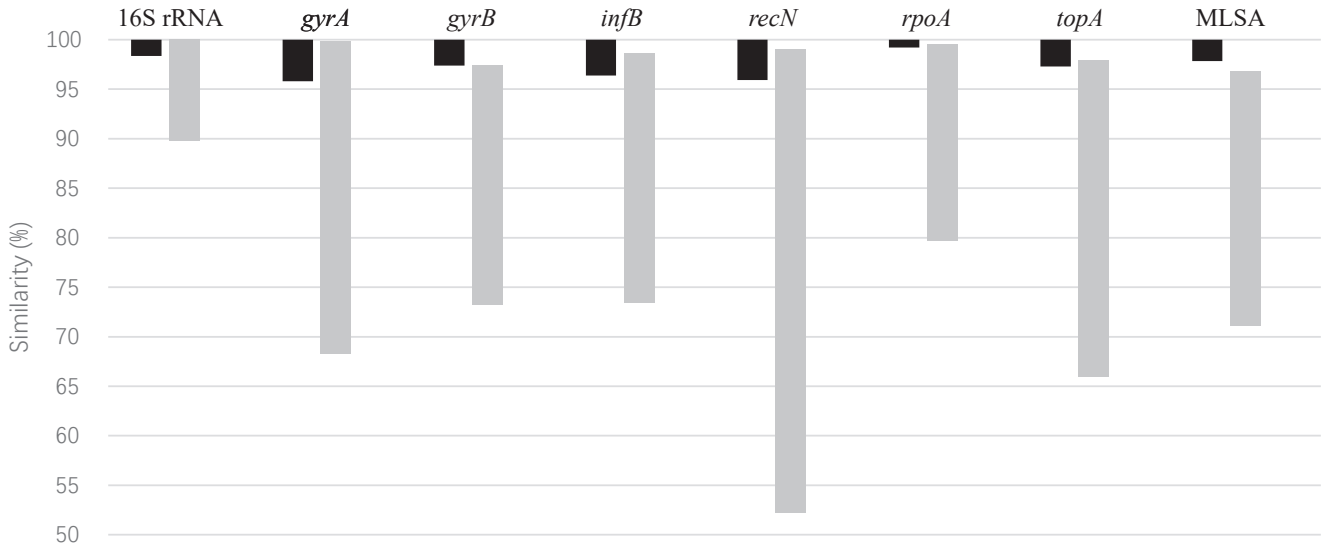

Source: https://biorxiv.org/content/biorxiv/early/2019/01/06/512624.full-text.pdf
